# Supplementary material for: An Essential Function for the ATR-Activation-Domain (AAD) of TopBP1 in Mouse Development and Cellular Senescence
Source: PubMed Central journal article supplement (PMC3738440; doi:10.1371/journal.pgen.1003702), 2013-08-08

# Zhou-Fig S3

**A**

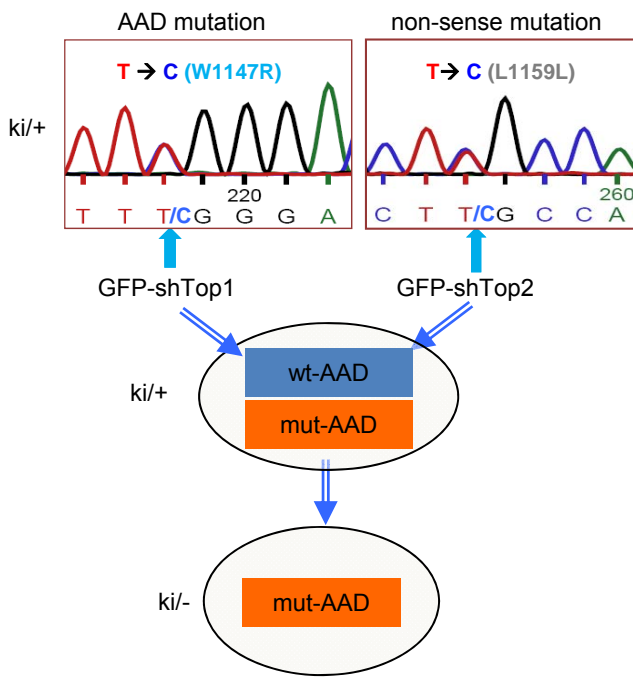

**B**

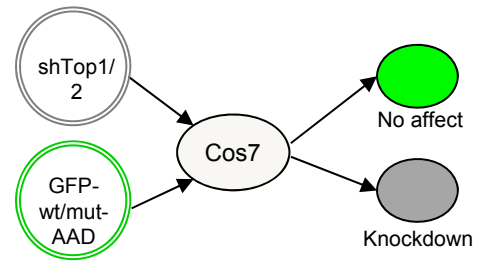

**C**

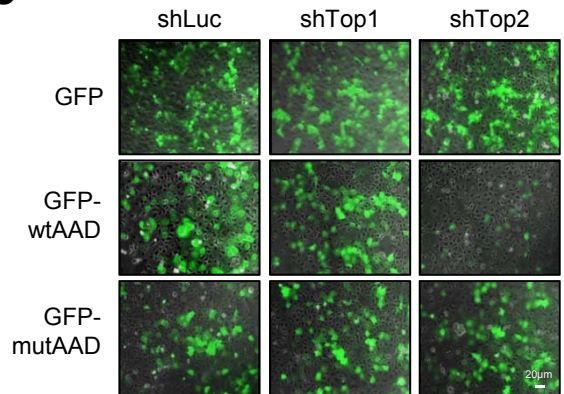

**D**

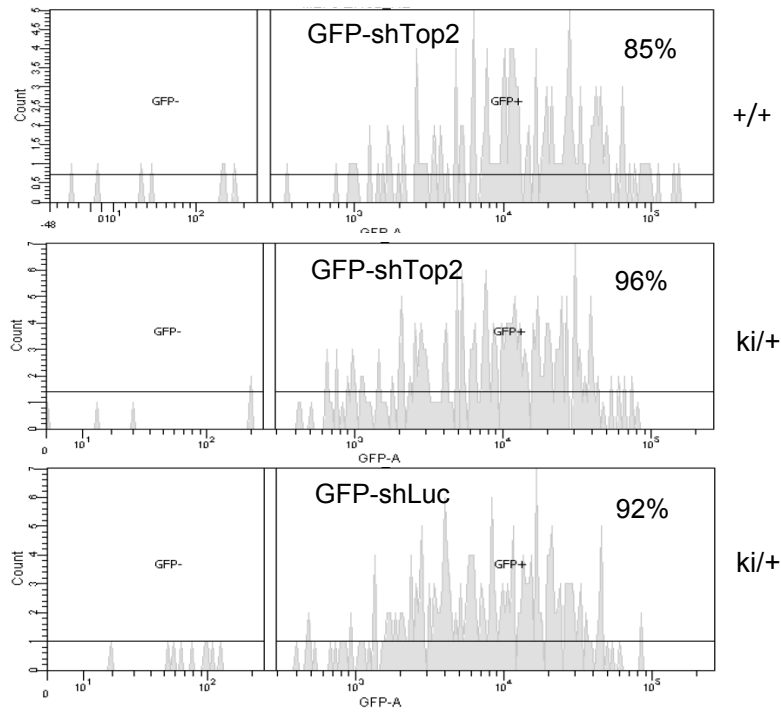

Supplement: pgen.1003702.s003.pdf [file pgen.1003702.s003.pdf]
